# Supplementary material for: Impact of CoFe2O4 Magnetic Nanoparticles on the Physical and Mechanical Properties and Shape Memory Effect of Polylactide
Source: MDPI journal article supplement (doi:10.3390/jcs8020048), 2024-01-27
Supplement: s1 [file s1]

## Supplementary information

# Impact of CoFe<sub>2</sub>O<sub>4</sub> Magnetic Nanoparticles on the Physical and Mechanical Properties and Shape Memory Effect of Polylactide

Anna Zimina <sup>1,\*</sup>, Aleksey Nikitin <sup>1</sup>, Vladislav Lvov <sup>1</sup>, Inna Bulygina <sup>1</sup>, Polina Kovaleva <sup>1</sup>,  
Stepan Vodopyanov <sup>1</sup>, Mikhail Zadorozhnyy <sup>1</sup>, Elizaveta Peshkina <sup>1</sup>, Saida Karshieva <sup>1,2</sup>,  
Rajan Choudhary <sup>3,4</sup>, Maxim Abakumov <sup>1</sup> and Fedor Senatov <sup>1</sup>

<sup>1</sup> Institute of Biomedical Engineering, National University of Science and Technology "MISIS", 119049 Moscow, Russia; nikitin.chemistry@mail.ru (A.N.); lvov.va@misis.ru (V.L.); ibulygina@misis.ru (I.B.); zhukova.pa@yandex.ru (P.K.); stepan.vodopianov@yandex.ru (S.V.); priboy38@mail.ru (M.Z.); m1909880@edu.misis.ru (E.P.); skarshieva@gmail.com (S.K.); abakumov.ma@misis.ru (M.A.); senatov@misis.ru (F.S.)

<sup>2</sup> N.N. Blokhin National Medical Research Center of Oncology, 115478 Moscow, Russia

<sup>3</sup> Rudolfs Cimdins Riga Biomaterials Innovations and Development Centre, Institute of General Chemical Engineering, Faculty of Materials Science and Applied Chemistry, Riga Technical University, Pulka St 3, LV-1007 Riga, Latvia; rajandeshwal@gmail.com

<sup>4</sup> Baltic Biomaterials Centre of Excellence, Riga Technical University, Kipsala Street 6A, LV-1048 Riga, Latvia

\* Correspondence: a.zimina@misis.ru

Supplementary information includes:

Table S1

Video S1

Figures S1–S7

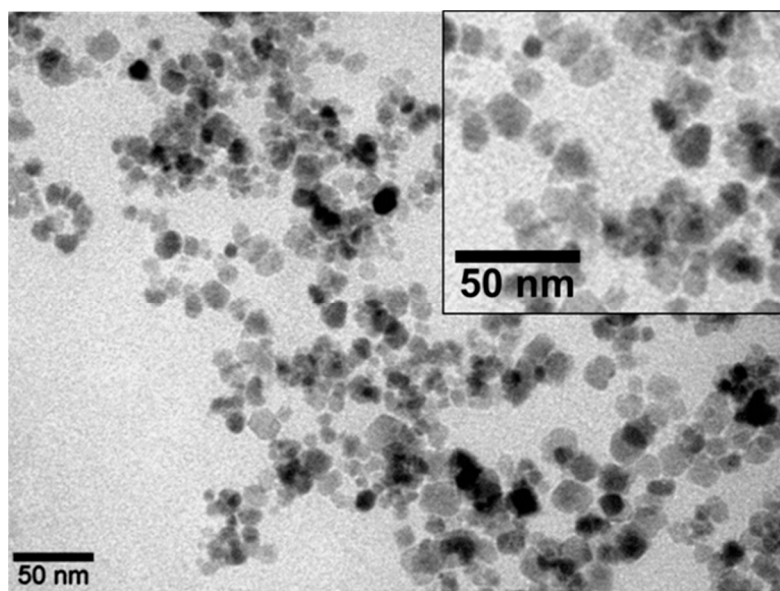

**Figure S1.** Bright-field TEM image of NPs.

**Table S1.** Main results of X-ray diffraction analysis of  $\text{CoFe}_2\text{O}_4$  NPs.

| Crystal lattice type | Space group | Coherent-scattering region, nm | Microstresses, % | Lattice period, a, nm |
|----------------------|-------------|--------------------------------|------------------|-----------------------|
| H1.1                 | Fd3m        | 9.3                            | 0.001            | 0.8370                |

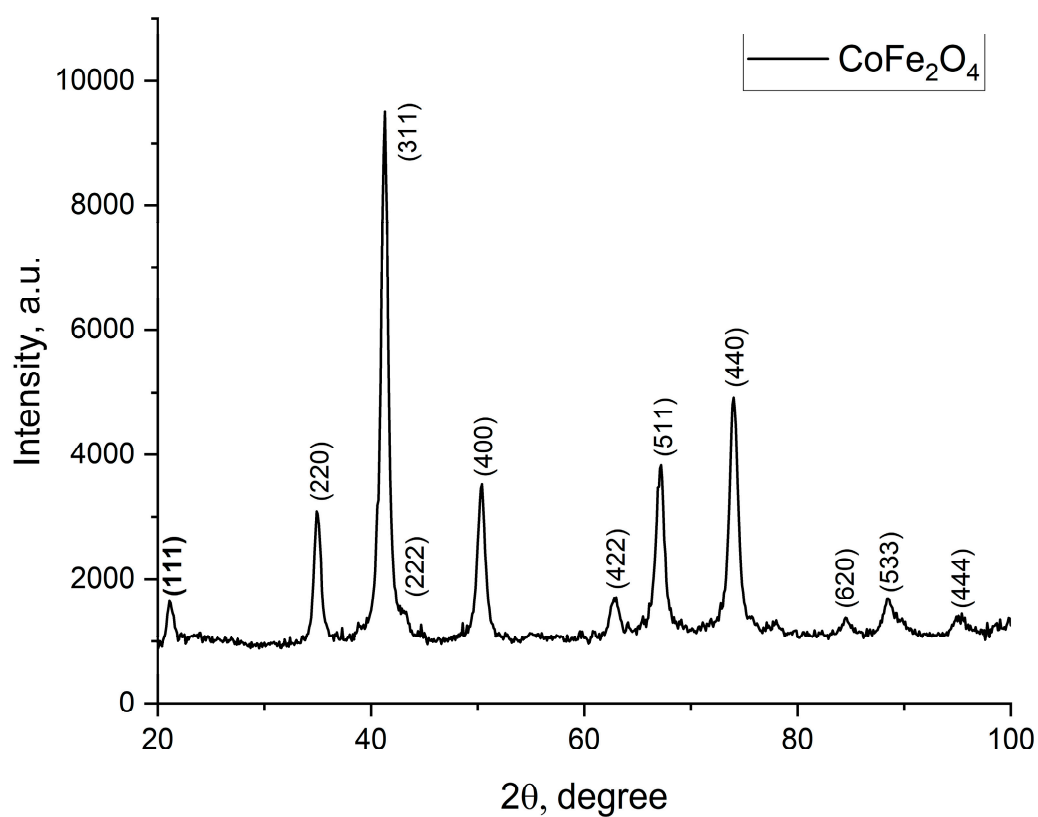

**Figure S2.** Diffractogram of cobalt ferrite MNPs powder.

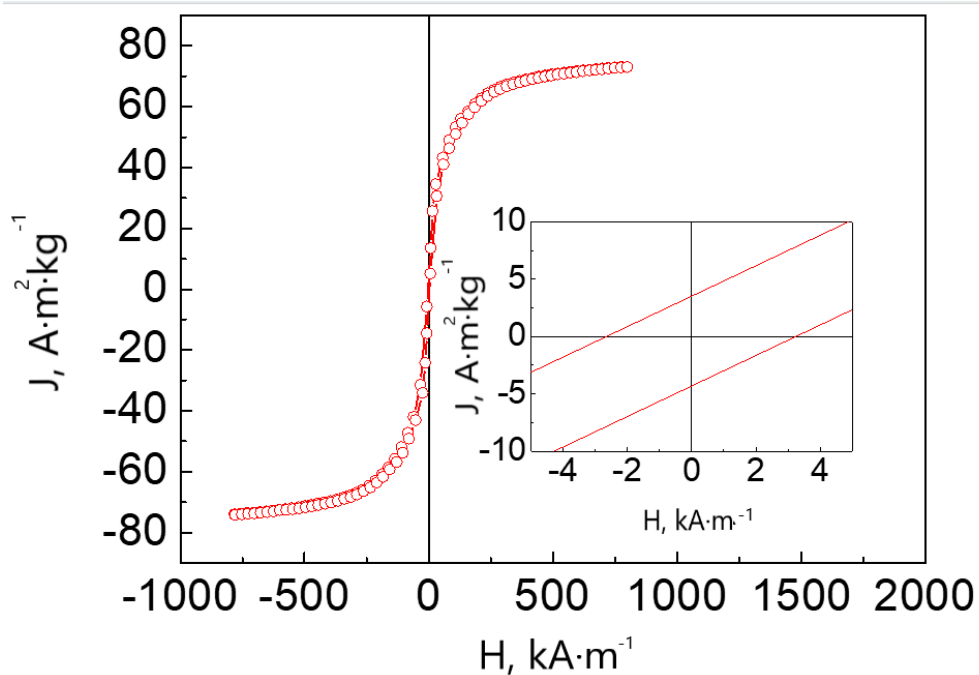

**Figure S3.** Magnetization curves of cobalt ferrite

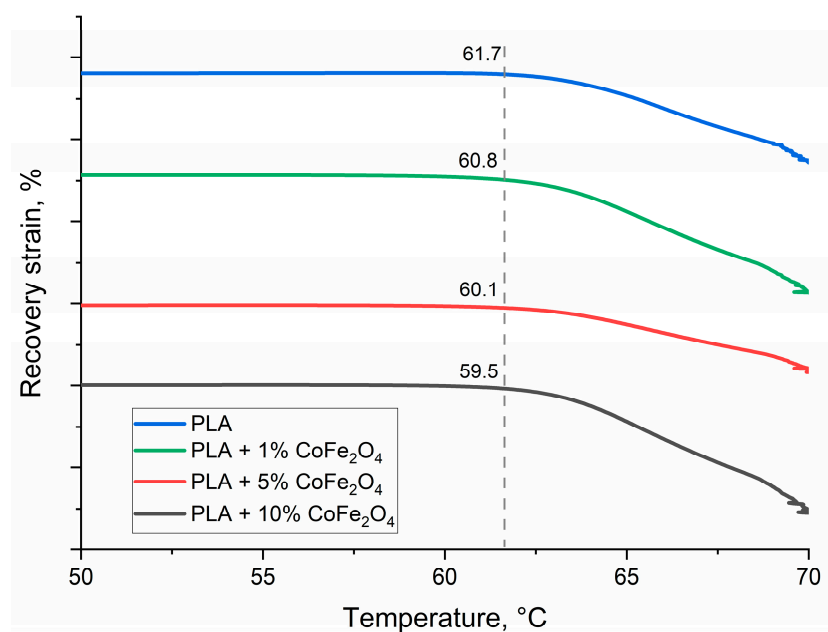

**Figure S4.** Recovery strain curves for PLA and PLA/CoFe<sub>2</sub>O<sub>4</sub> (1, 5, 10 wt. %) samples.

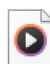

Video S1 Shape  
recovery in HFAMF in

**Video S1.** Shape recovery in HFAMF in the presence of mouse s small intestine.

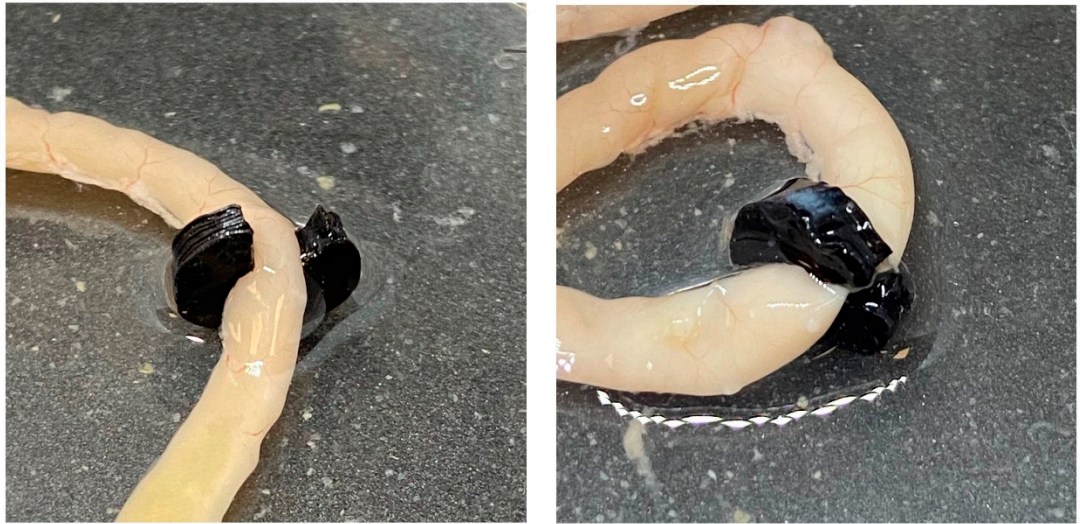

**Figure S5.** Demonstration of SME in small intestine.

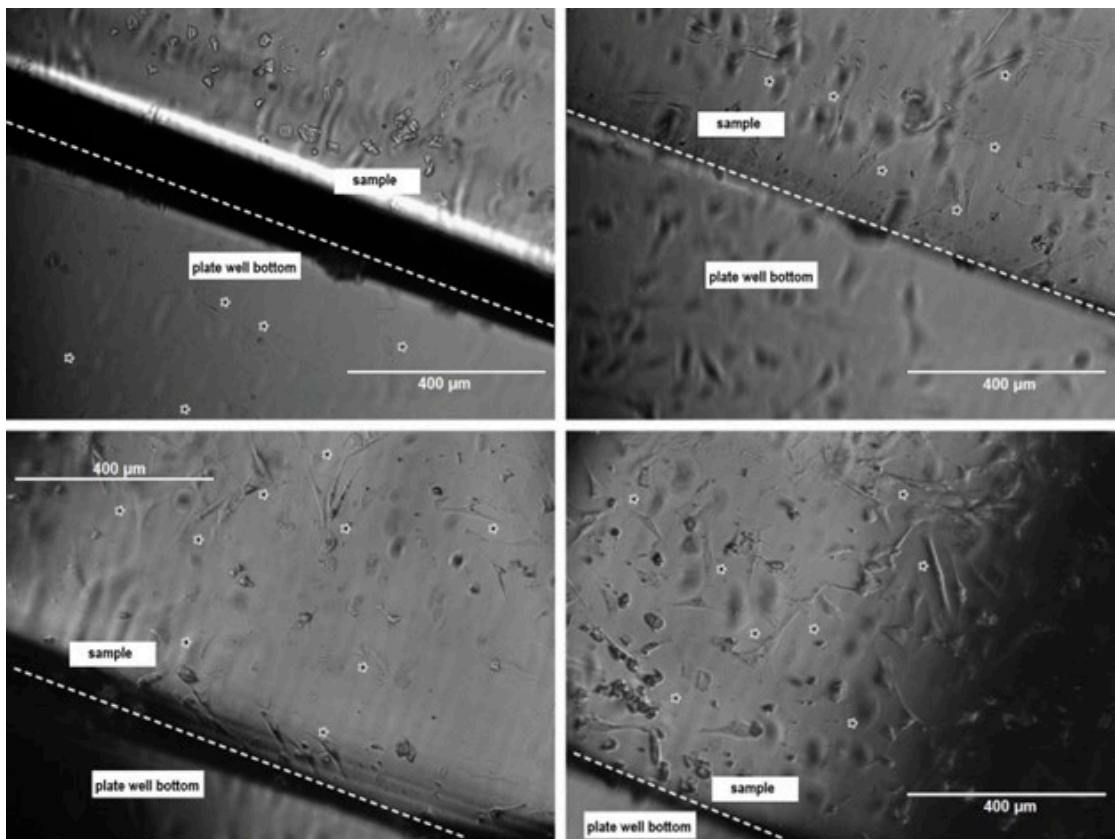

**Figure S6.** Mesenchymal stem cells (\*) at the bottom of the plate well and on the surface of the PLA sample.

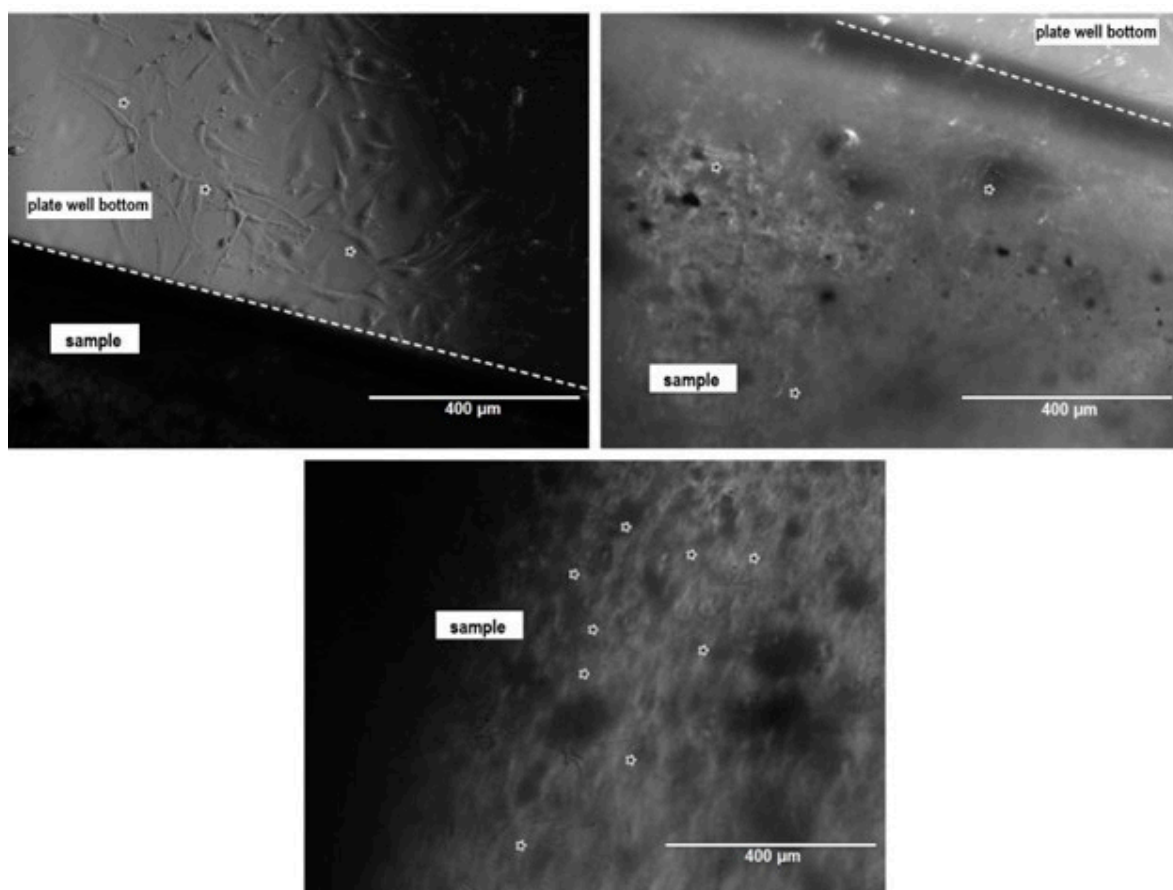

**Figure S7.** Mesenchymal stem cells (\*) at the bottom of the plate well and on the surface of the PLA/CoFe<sub>2</sub>O<sub>4</sub> (1 wt. %).
